# Supplementary material for: Sex Differences and Predictors of In-Hospital Mortality among Patients with COVID-19: Results from the ANCOHVID Multicentre Study
Source: MDPI journal article supplement (doi:10.3390/ijerph18179018), 2021-08-26
Supplement: s1 [file s1]

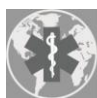

**Table S1.** STROBE (Strengthening The Reporting of Observational Studies in Epidemiology) Checklist.

| Section and Item          | Item No. | Recommendation                                                                                                                                                                        | Reported on                                                                                                                                                                                                                                              |
|---------------------------|----------|---------------------------------------------------------------------------------------------------------------------------------------------------------------------------------------|----------------------------------------------------------------------------------------------------------------------------------------------------------------------------------------------------------------------------------------------------------|
| Title and Abstract        | 1        | (a) Indicate the study’s design with a commonly used term in the title or the abstract.                                                                                               | The study design was specified in the abstract. Page 1.                                                                                                                                                                                                  |
|                           |          | (b) Provide in the abstract an informative and balanced summary of what was done and what was found.                                                                                  | Information on the methods and main results was provided in the abstract. Page 1.                                                                                                                                                                        |
| Introduction              |          |                                                                                                                                                                                       |                                                                                                                                                                                                                                                          |
| Background/Rationale      | 2        | Explain the scientific background and rationale for the investigation being reported.                                                                                                 | The scientific background and interest of the study are explained in the introduction. Pages 1, 2.                                                                                                                                                       |
| Objectives                | 3        | State specific objectives, including any prespecified hypotheses.                                                                                                                     | The objectives are stated in the last paragraph of the introduction. Page 2.                                                                                                                                                                             |
| Methods                   |          |                                                                                                                                                                                       |                                                                                                                                                                                                                                                          |
| Study Design              | 4        | Present key elements of study design early in the paper.                                                                                                                              | The study design is presented in Methods (2.1). Page 2.                                                                                                                                                                                                  |
| Setting                   | 5        | Describe the setting, locations, and relevant dates, including periods of recruitment, exposure, follow-up, and data collection.                                                      | The setting, locations and relevant dates are described in Methods (2.1). Page 2. Data collection is described in Methods (2.2.). Page 3.                                                                                                                |
| Participants              | 6        | Give the eligibility criteria, and the sources and methods of case ascertainment and control selection. Give the rationale for the choice of cases and controls.                      | The eligibility criteria, as well as the methods of case ascertainment are included in Methods (2.1). Page 2.                                                                                                                                            |
| Variables                 | 7        | Clearly define all outcomes, exposures, predictors, potential confounders, and effect modifiers. Give diagnostic criteria, if applicable.                                             | Variables are detailed in Methods (2.2). Page 3. A complete list of variables and their definitions are provided in Supplementary Material S2.                                                                                                           |
| Data Sources/ Measurement | 8        | For each variable of interest, give sources of data and details of methods of assessment (measurement). Describe comparability of assessment methods if there is more than one group. | Data sources are explained in Methods (2.2). Page 3. Assessment methods were the same for every patient.                                                                                                                                                 |
| Bias                      | 9        | Describe any efforts to address potential sources of bias.                                                                                                                            | Selection bias: all (consecutive) cases who met the eligibility criteria were included. Information bias: standard and well-defined variables were used. Confusion bias: statistical analyses were performed adjusting by potential confounders. Page 3. |
| Study Size                | 10       | Explain how the study size was arrived at.                                                                                                                                            | All available cases were included, there was no size determination.                                                                                                                                                                                      |
| Quantitative Variables    | 11       | Explain how quantitative variables were handled in the analyses. If applicable, describe which groupings were chosen and why.                                                         | Quantitative variables were presented as such (continuous except for CURB-65 score, which is discrete) and also categorized in the bivariate analysis; they were treated as quantitative in the multivariate analysis.                                   |
| Statistical Methods       | 12       | (a) Describe all statistical methods, including those used to control for confounding.                                                                                                | (a) Detailed in Methods (2.3). Page 3.                                                                                                                                                                                                                   |
|                           |          | b) Describe any methods used to examine subgroups and interactions.                                                                                                                   | (b) We compared subjects with concurrent infection vs. those without (replicating the same multivariate analysis detailed in 2.3 in both subsets of patients) to explore the effect of treatment with azithromycin.                                      |
|                           |          | (c) Explain how missing data were addressed.                                                                                                                                          | (c) Explained in Methods (2.2). Page 3.                                                                                                                                                                                                                  |
|                           |          | (d) If applicable, explain how matching of cases and controls was addressed.                                                                                                          | (d) Not applicable.                                                                                                                                                                                                                                      |
|                           |          | (e) Describe any sensitivity analyses.                                                                                                                                                | (e) Not applicable.                                                                                                                                                                                                                                      |
| Results                   |          |                                                                                                                                                                                       |                                                                                                                                                                                                                                                          |

|                          |    |                                                                                                                                                                                                               |                                                                                                                                                                         |
|--------------------------|----|---------------------------------------------------------------------------------------------------------------------------------------------------------------------------------------------------------------|-------------------------------------------------------------------------------------------------------------------------------------------------------------------------|
| Participants             | 13 | (a) Report numbers of individuals at each stage of study—eg numbers potentially eligible, examined for eligibility, confirmed eligible, included in the study, completing follow-up, and analysed.            | (a) Explained in the first paragraph of Results. Page 4.                                                                                                                |
|                          |    | (b) Give reasons for non-participation at each stage.                                                                                                                                                         | (b) Only one patient was excluded, the reason (age) is provided in Results. Page 4.                                                                                     |
|                          |    | (c) Consider use of a flow diagram.                                                                                                                                                                           | (c) Not useful in this study.                                                                                                                                           |
| Participants             | 14 | (a) Give characteristics of study participants (eg demographic, clinical, social) and information on exposures and potential confounders.                                                                     | (a) Given in Table 1. Pages 5, 6. Distribution of age and sex is detailed in Figure 1. Page 4. Correlation matrices of comorbidities are presented in Figure 2. Page 7. |
|                          |    | (b) Indicate the number of participants with missing data for each variable of interest.                                                                                                                      | (b) Included in Table 1. Pages 5, 6.                                                                                                                                    |
| Outcome Data             | 15 | Report numbers in each exposure category, or summary measures of exposure.                                                                                                                                    | Reported in Table 1. Pages 5, 6.                                                                                                                                        |
| Main Results             | 16 | (a) Give unadjusted estimates and, if applicable, confounder-adjusted estimates and their precision (eg, 95% confidence interval). Make clear which confounders were adjusted for and why they were included. | (a) Unadjusted and adjusted estimates, along with their precision are presented in Table 2. Page 10.                                                                    |
|                          |    | (b) Report category boundaries when continuous variables were categorized.                                                                                                                                    | (b) Reported in Table 1. Pages 5, 6.                                                                                                                                    |
|                          |    | (c) If relevant, consider translating estimates of relative risk into absolute risk for a meaningful time period.                                                                                             | (c) Not applicable.                                                                                                                                                     |
| Other Analyses           | 17 | Report other analyses done—eg analyses of subgroups and interactions, and sensitivity analyses.                                                                                                               | Other analyses (eg survival analysis) are reported in Results (3.1. and 3.2.). Pages 4–9. They are also shown in Figures 2, 3, and 4. Pages 7, 8 and 9, respectively.   |
| <b>Discussion</b>        |    |                                                                                                                                                                                                               |                                                                                                                                                                         |
| Key Results              | 18 | Summarize key results with reference to study objectives.                                                                                                                                                     | Summarized in Conclusions. Page 13.                                                                                                                                     |
| Limitations              | 19 | Discuss limitations of the study, taking into account sources of potential bias or imprecision. Discuss both direction and magnitude of any potential bias.                                                   | Included in Discussion (4.3.). Page 13.                                                                                                                                 |
| Interpretation           | 20 | Give a cautious overall interpretation of results considering objectives, limitations, multiplicity of analyses, results from similar studies, and other relevant evidence.                                   | A comprehensive interpretation of the study results is provided throughout Discussion (4.1. and 4.2.). Pages 10–13.                                                     |
| Generalizability         | 21 | Discuss the generalizability (external validity) of the study results.                                                                                                                                        | Included in Discussion (4.3.). Page 13.                                                                                                                                 |
| <b>Other information</b> |    |                                                                                                                                                                                                               |                                                                                                                                                                         |
| Funding                  | 22 | Give the source of funding and the role of the funders for the present study and, if applicable, for the original study on which the present article is based.                                                | Included in Funding. Page 13.                                                                                                                                           |

**Table S2.** List of variables and their definitions.

| Variable                                     | Definition                                                                                                                                                                                                                                                                                                                                                                                                                                            |
|----------------------------------------------|-------------------------------------------------------------------------------------------------------------------------------------------------------------------------------------------------------------------------------------------------------------------------------------------------------------------------------------------------------------------------------------------------------------------------------------------------------|
| <b>Sociodemographic characteristics</b>      |                                                                                                                                                                                                                                                                                                                                                                                                                                                       |
| Age                                          | Age at the time of COVID-19 diagnosis, in years                                                                                                                                                                                                                                                                                                                                                                                                       |
| Sex                                          | Considered as binary: male or female                                                                                                                                                                                                                                                                                                                                                                                                                  |
| Country of birth                             | Patients were considered native if they were born in Spain and non-native if not                                                                                                                                                                                                                                                                                                                                                                      |
| Place of residence                           | Living at home, nursing homes (part-time or full time) and institutions for people with disabilities (part-time or full-time)                                                                                                                                                                                                                                                                                                                         |
| Dependency in activities of daily living     | Patients were considered dependent in activities of daily living if they required a caregiver (formal or informal)                                                                                                                                                                                                                                                                                                                                    |
| <b>Chronic conditions</b>                    |                                                                                                                                                                                                                                                                                                                                                                                                                                                       |
| Arterial hypertension                        | History of arterial hypertension (essential or secondary)                                                                                                                                                                                                                                                                                                                                                                                             |
| Diabetes                                     | History of type 1 or type 2 diabetes mellitus                                                                                                                                                                                                                                                                                                                                                                                                         |
| Cardiovascular disease                       | History of coronary artery disease, chronic cardiac insufficiency, venous thromboembolism, cardiac arrhythmia, valvular heart disease or myocardiopathy                                                                                                                                                                                                                                                                                               |
| Chronic lung disease                         | History of non-allergic asthma, chronic obstructive pulmonary disease, interstitial lung disease, obstructive sleep apnea syndrome or cystic fibrosis                                                                                                                                                                                                                                                                                                 |
| Chronic obstructive pulmonary disease        | History of chronic obstructive pulmonary disease                                                                                                                                                                                                                                                                                                                                                                                                      |
| Non-allergic asthma                          | History of intrinsic asthma, i.e., triggered by factors other than allergens                                                                                                                                                                                                                                                                                                                                                                          |
| Chronic kidney disease                       | History of chronic kidney disease, defined by signs of kidney damage or by a glomerular filtration rate under 90 ml/min/1.73m <sup>2</sup>                                                                                                                                                                                                                                                                                                            |
| Active cancer                                | Any solid or hematologic malignancy (excluding non-melanoma skin cancer) at the time of COVID-19 diagnosis                                                                                                                                                                                                                                                                                                                                            |
| History of cancer in the previous five years | History of any solid or hematologic malignancy (excluding non-melanoma skin cancer) in the previous five years, in remission at the time of COVID-19 diagnosis                                                                                                                                                                                                                                                                                        |
| Autoimmune disease                           | History of any autoimmune disease (rheumatoid arthritis, inflammatory bowel disease, multiple sclerosis, psoriasis, celiac disease, systemic lupus erythematosus...)                                                                                                                                                                                                                                                                                  |
| Obesity                                      | Body mass index of 30 and above at the time of COVID-19 diagnosis, in kg/m <sup>2</sup>                                                                                                                                                                                                                                                                                                                                                               |
| Tobacco smoking                              | Status of current tobacco smoker (any number of cigarettes) at the time of COVID-19 diagnosis                                                                                                                                                                                                                                                                                                                                                         |
| History of previous transplantation          | History of any previous solid organ or hematopoietic stem-cell transplantation                                                                                                                                                                                                                                                                                                                                                                        |
| HIV infection                                | History of confirmed infection by human immunodeficiency virus (HIV), regardless of the viral load and the CD4+ T-cell count                                                                                                                                                                                                                                                                                                                          |
| <b>Treatments received</b>                   |                                                                                                                                                                                                                                                                                                                                                                                                                                                       |
| Polymedication prior to admission            | Patients were considered polymedicated if they usually received six or more different drugs prior to admission                                                                                                                                                                                                                                                                                                                                        |
| Immunosuppressive therapy prior to admission | Patients were considered medically immunosuppressed if they usually received drugs responsible for high-level immunosuppression ( $\geq 20$ mg/day of prednisone or equivalent for at least 14 consecutive days, $\geq 3$ mg/kg/day of azathioprine, $\geq 1.5$ mg/kg/day of mercaptopurine, chemotherapy, biologic therapies...)                                                                                                                     |
| Hydroxychloroquine                           | Administration of any dose of hydroxychloroquine to treat COVID-19 during hospital stay                                                                                                                                                                                                                                                                                                                                                               |
| Lopinavir-ritonavir                          | Administration of any dose of lopinavir-ritonavir to treat COVID-19 during hospital stay                                                                                                                                                                                                                                                                                                                                                              |
| Azithromycin                                 | Administration of any dose of azithromycin to treat COVID-19 during hospital stay                                                                                                                                                                                                                                                                                                                                                                     |
| Other antibiotics                            | Administration of any dose of any antibiotics other than azithromycin to treat COVID-19 during hospital stay                                                                                                                                                                                                                                                                                                                                          |
| Tocilizumab                                  | Administration of any dose of tocilizumab to treat COVID-19 during hospital stay                                                                                                                                                                                                                                                                                                                                                                      |
| High-dose systemic corticosteroids           | Administration of corticosteroid boluses or more than 40 mg/day of prednisone or equivalents (e.g., 6 mg/day of dexamethasone) for at least 7 consecutive days to treat COVID-19 during hospital stay                                                                                                                                                                                                                                                 |
| <b>Clinical data</b>                         |                                                                                                                                                                                                                                                                                                                                                                                                                                                       |
| Abnormal chest X-ray at admission            | Abnormal radiographic findings attributable to COVID-19 (ground glass opacities, interstitial thickening, consolidations...) in the first chest X-ray performed within the first 5 days of hospitalisation                                                                                                                                                                                                                                            |
| Ferritin levels upon admission               | Serum ferritin levels in the first blood test performed within the first 5 days of hospitalisation                                                                                                                                                                                                                                                                                                                                                    |
| Acute distress respiratory syndrome          | Acute distress respiratory syndrome during hospital stay, according to the 2012 Berlin definition: 1) onset over 7 days or less, 2) radiographic findings consistent with pulmonary oedema, 3) PaO <sub>2</sub> /FiO <sub>2</sub> ratio <300 mm Hg receiving positive end-expiratory pressure (PEEP) or continuous positive airway pressure (CPAP) of at least 5 cm H <sub>2</sub> O, and 4) not fully explained by cardiac failure or fluid overload |
| Concurrent infection                         | Coinfection or superinfection by any pathogen other than SARS-CoV-2 during hospital stay                                                                                                                                                                                                                                                                                                                                                              |
| Need for invasive mechanical ventilation     | Need for invasive mechanical ventilation (IMV) was considered when patients were ventilated by orotracheal intubation or by tracheostomy tube                                                                                                                                                                                                                                                                                                         |

|                                              |                                                                                                                                                                                                                                                                |
|----------------------------------------------|----------------------------------------------------------------------------------------------------------------------------------------------------------------------------------------------------------------------------------------------------------------|
| Need for non-invasive mechanical ventilation | Need for non-invasive mechanical ventilation (NIMV) was considered when patients were ventilated by continuous positive airway pressure (CPAP) or bilevel positive airway pressure (BiPAP)                                                                     |
| Length of stay                               | Total length of hospital and intensive care unit (ICU) stay, considering the first hospital and ICU admission, respectively, as well as readmissions due to active SARS-CoV-2 infection (therefore excluding those due to COVID-19 sequelae), in days          |
| CURB-65 Severity score upon admission        | Result of the CURB-65 score applied upon hospital admission. It is a five point severity score, one point for each of: confusion, urea >7 mmol/l, respiratory rate ≥30/min, low systolic (<90 mm Hg) or diastolic (≤60 mm Hg) blood pressure and age ≥65 years |
| <b>Outcomes</b>                              |                                                                                                                                                                                                                                                                |
| Admission to the intensive care unit         | Admission to the intensive care unit at any point during hospital stay                                                                                                                                                                                         |
| Death                                        | Death due to any cause at any point during hospital stay                                                                                                                                                                                                       |

**Table S3.** Cox regression model for in-hospital mortality among all admitted patients.

| Variables                           | Crude HR<br>(95% CI) | <i>p</i> value <sup>a</sup> | Adjusted HR<br>(95% CI) | <i>p</i> value <sup>a</sup> |
|-------------------------------------|----------------------|-----------------------------|-------------------------|-----------------------------|
| Age, years                          | 1.08 (1.06-1.09)     | <0.001                      | 1.05 (1.03-1.07)        | <0.001                      |
| Male sex                            | 1.06 (0.78-1.44)     | 0.696                       | 1.25 (0.88-1.77)        | 0.211                       |
| Active cancer                       | 2.13 (1.31-3.49)     | 0.002                       | 2.54 (1.38-4.70)        | 0.003                       |
| CURB-65 score upon admission        | 2.64 (2.24-3.11)     | <0.001                      | 2.03 (1.67-2.47)        | <0.001                      |
| Azithromycin treatment              | 0.32 (0.23-0.44)     | <0.001                      | 0.49 (0.35-0.70)        | <0.001                      |
| Non-invasive mechanical ventilation | 0.39 (0.22-0.68)     | <0.001                      | 0.48 (0.25-0.91)        | 0.024                       |

CI, confidence interval; CURB-65, prognostic scale based on blood urea nitrogen, respiratory rate, blood pressure and age; HR, hazard ratio. <sup>a</sup> *p*-value of Wald's test. The concordance index of the model was 0.85.
